# Supplementary material for: Model-based assessment of public health impact and cost-effectiveness of dengue vaccination following screening for prior exposure
Source: PubMed Central journal article supplement (PMC6625736; doi:10.1371/journal.pntd.0007482), 2019-07-01
Supplement: pntd.0007482.s001.pdf [file pntd.0007482.s001.pdf]

### **Appendix S1. Process for achieving a desired value of $PE_9$ in model simulations.**

To afford the model the flexibility to achieve a range of transmission intensities, as defined by  $PE_9$ , we developed a statistical emulator of  $PE_9$  as a function of three unknown model parameters (rate at which DENV is seeded into the population, mosquito infectiousness, adult female mosquito emergence rate). To do so, we generated  $10^3$  combinations of these three parameters using the sobol function in the pomp library [25] in R [26]. This function generates points that maximize distance between them within a prescribed range of values for each parameter (DENV seeding rate:  $8 \times 10^{-6}$ - $2 \times 10^{-4}$ ; mosquito infectiousness: 0-1; adult female mosquito emergence rate: 0-3). After simulating 40 years of transmission with a given set of those three parameters, we retrieved  $PE_9$  from all such simulations and fitted a generalized additive model of  $PE_9$  with independent smooth terms for each of the three parameters ( $R^2 = 0.98$ ). In subsequent simulations focused on vaccination impact, we obtained a set of the three unknown model parameters consistent with a target value of  $PE_9$  by repeatedly drawing sets of the three parameters until we obtained one that was associated with a value of  $PE_9$  within one percent of the target  $PE_9$  value.
